# Supplementary material for: Evolution of cis-regulatory modules for the head organizer gene goosecoid in chordates: comparisons between Branchiostoma and Xenopus
Source: PubMed Central journal article supplement (PMC6679436; doi:10.1186/s40851-019-0143-1), 2019-08-02
Supplement: 40851_2019_143_MOESM1_ESM.pdf [file 40851_2019_143_MOESM1_ESM.pdf]

Figure S1

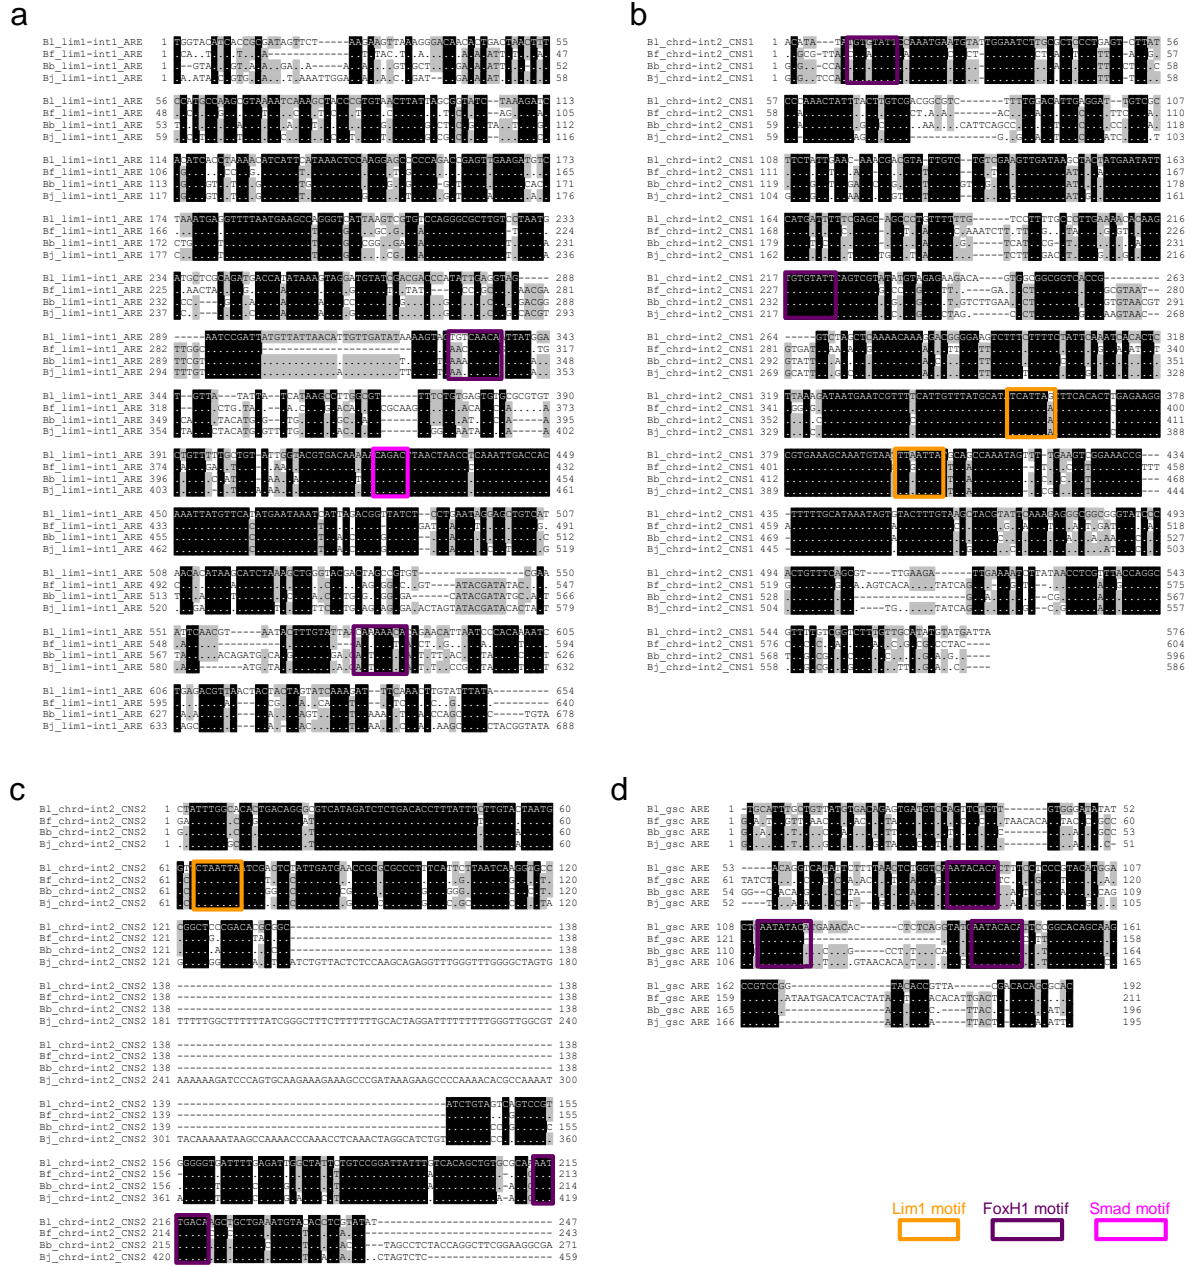

Figure S2

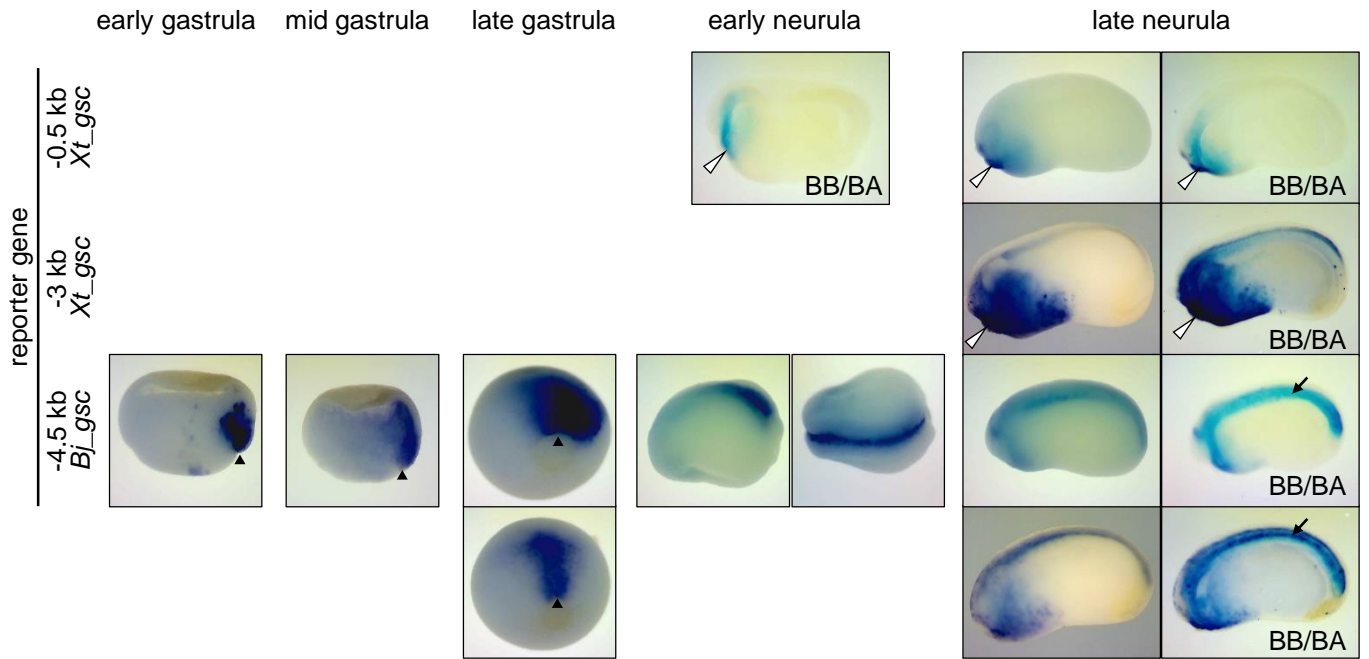

| Reporter              | Stage                          | Reproducible expr.         | Ectopic expr. | No expr. | Total |
|-----------------------|--------------------------------|----------------------------|---------------|----------|-------|
| -0.5 kb <i>Xt_gsc</i> | Mid-Late Neurula               | 13 (Mouth)                 | 0             | 9        | 22    |
| -3 kb <i>Xt_gsc</i>   | Early-Mid gastrula             | 13 (Organizer)             | 6             | 22       | 41    |
|                       | Late gastrula                  | 14 (Head organizer)        | 9             | 33       | 56    |
|                       | Mid-Late Neurula               | 13 (Mouth + neural tissue) | 1             | 2        | 16    |
| -4.5 kb <i>Bj_gsc</i> | Early-mid gastrula*            | 5 (Organizer)              | 1             | 17       | 23    |
|                       |                                | 28 (Organizer)             | 14            | 6        | 48    |
|                       | Late gastrula*                 | 2 (Posterior mesoderm)     | 3             | 26       | 31    |
|                       |                                | 17 (Posterior mesoderm)    | 3             | 10       | 30    |
| Mid-Late Neurula*     | 19 (notochord + neural tissue) | 2                          | 13            | 34       |       |
|                       | 40 (notochord + neural tissue) | 12                         | 22            | 74       |       |

\*results of two independent experiments are shown in separate lines
